# Supplementary material
Source: Springer Nature journal article supplement (https://www.springermedizin.de/resource/supplementary/12888_2012_1188_MOESM1_ESM.pdf/9480258)
Supplement: MOESM1 [file 9480258]

397 potentially relevant articles  
(Pudmed =157 Ebsco 114 Web of Science= 126)

Excluded based on title  
n= 203

49 references screened by abstracts

Excluded  
n= 4 review articles  
n= 18 no outcomes of interest

27 relevant studies retrieved for detailed  
evaluation

Excluded n= 4

23 studies in the meta-analysis
